# Supplementary material
Source: PubMed Central journal article supplement (PMC3591672)

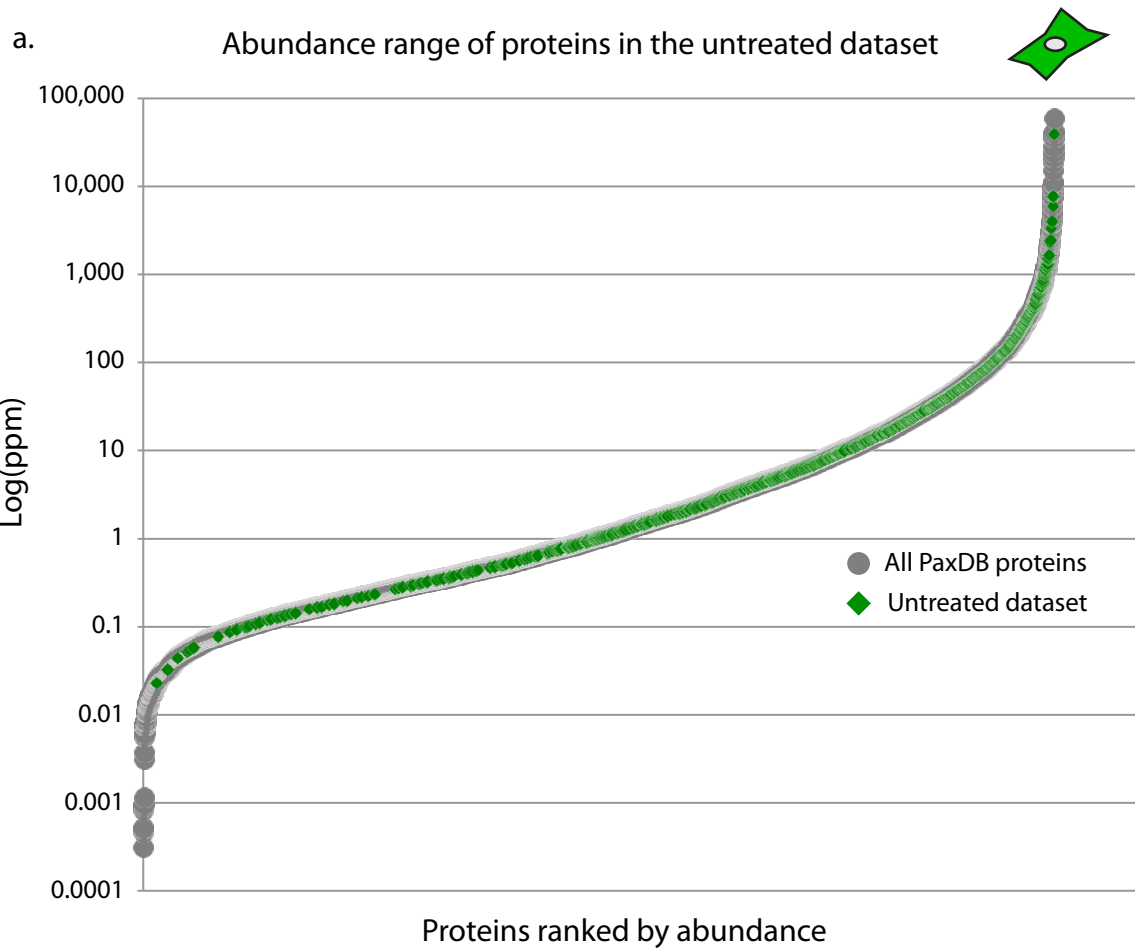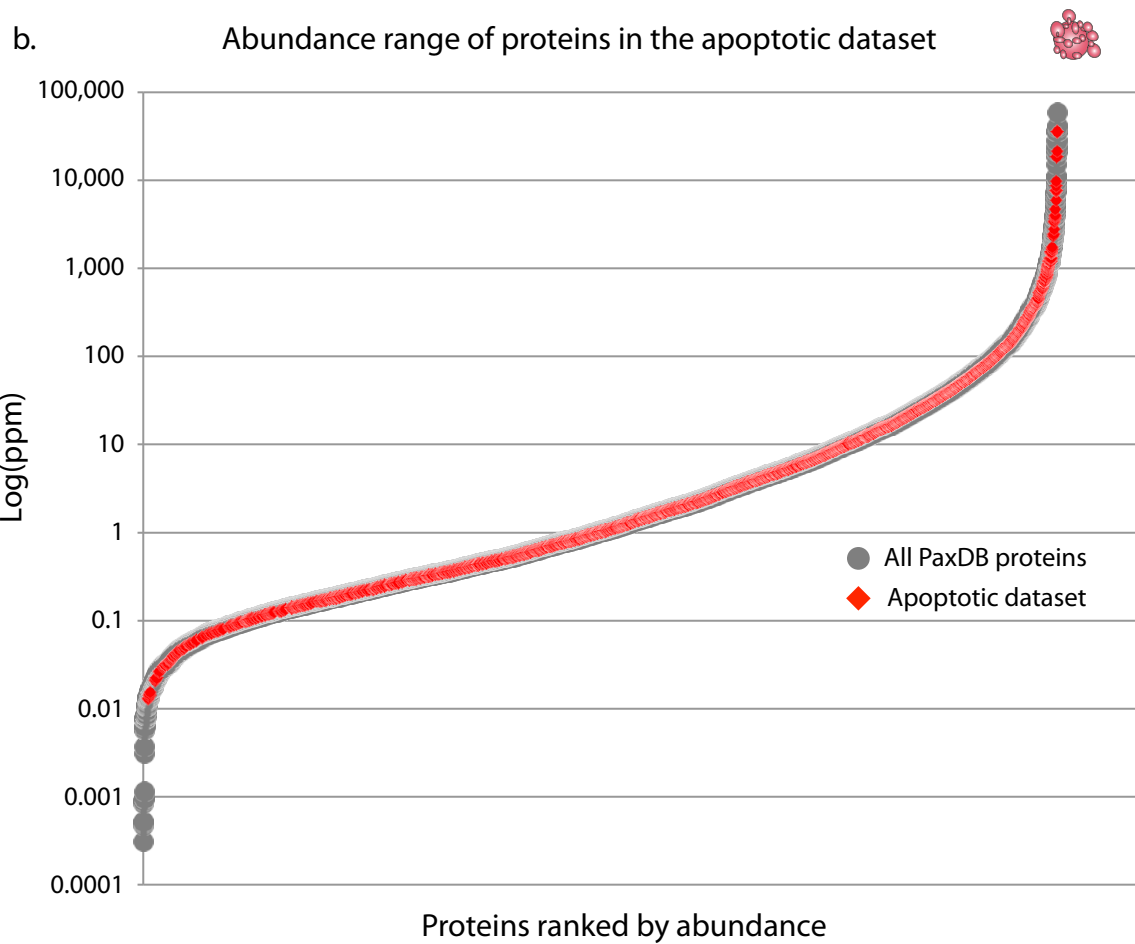

c. Abundance range of proteins in the apoptotic caspase-cleaved dataset

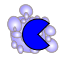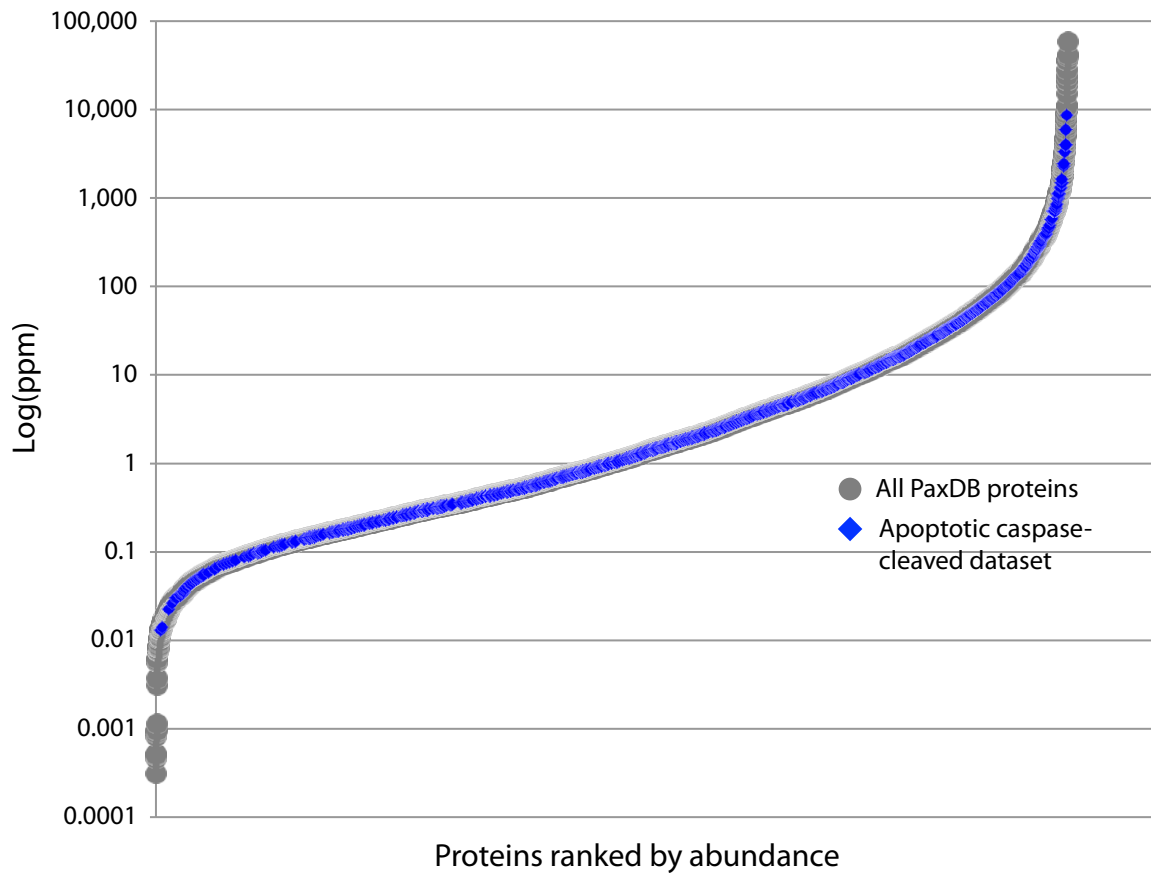

d. Abundance histogram for all datasets

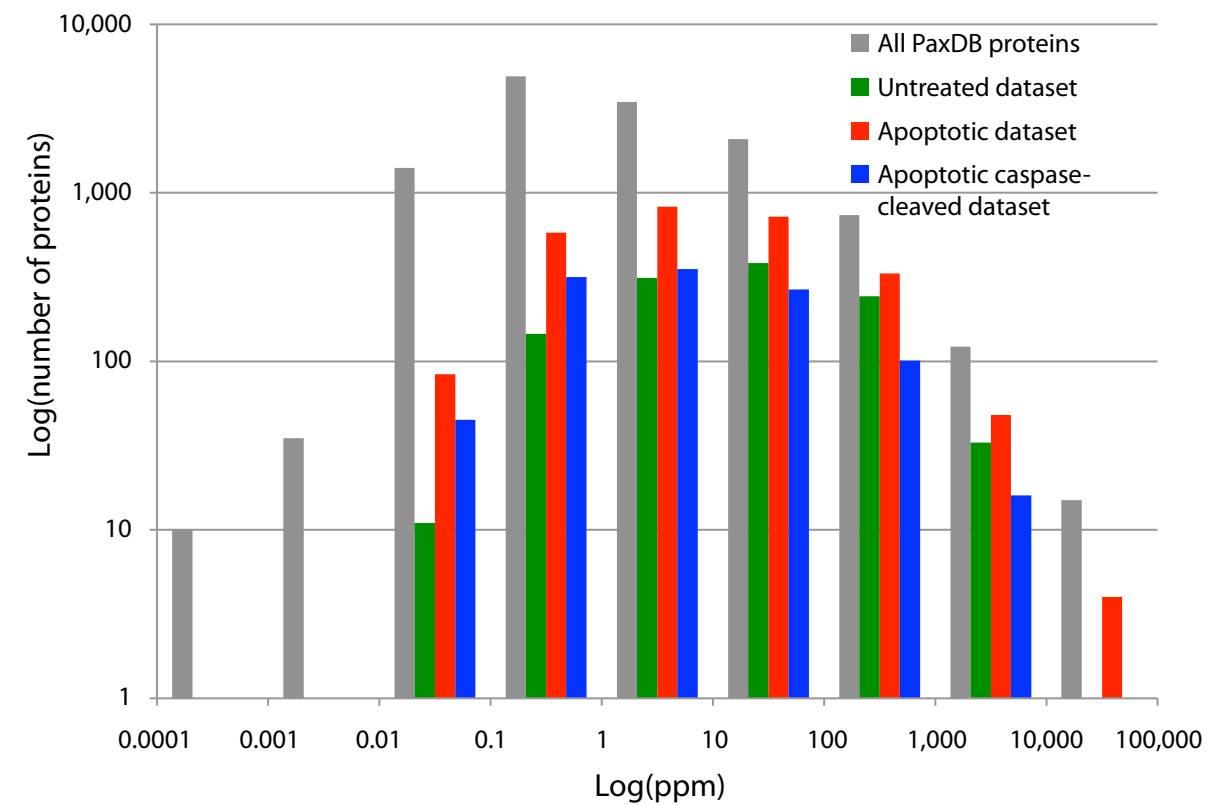

Supplemental Figure 2

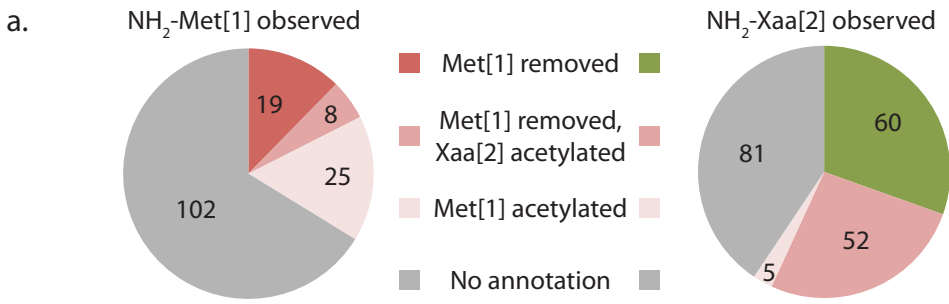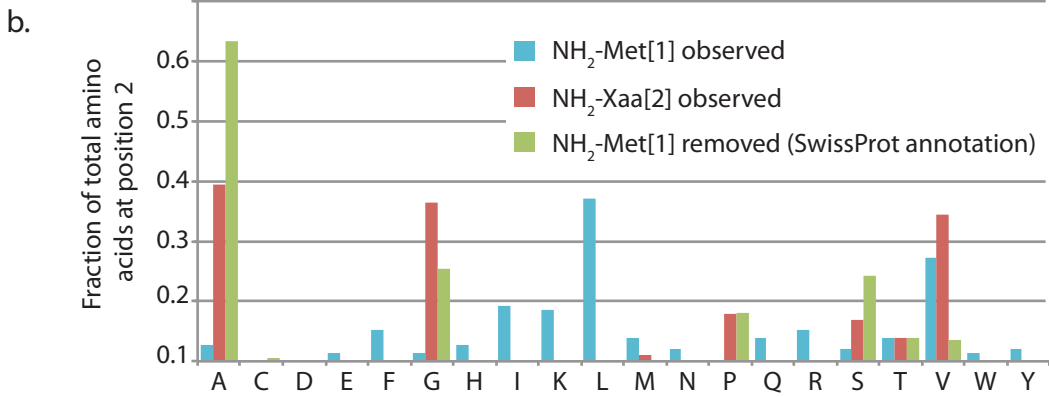

### Supplemental Figure 3

- Observed same as SwissProt
- Observed C-term of SwissProt by 1 residue
- Observed C-term of SwissProt by >1 residue
- Observed N-term of SwissProt by 1 residue
- Observed N-term of SwissProt by >1 residue
- No SwissProt annotation

a. Transit peptide removal sites (all proteins in MitoCarta):

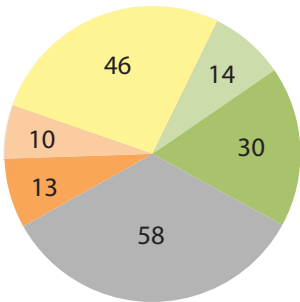

b. Signal peptide removal sites:

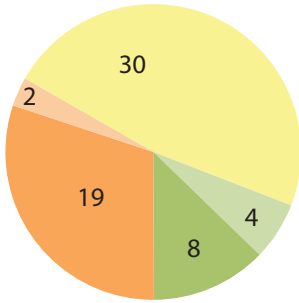

a. Untreated dataset, cleavage site P1' is 3-65

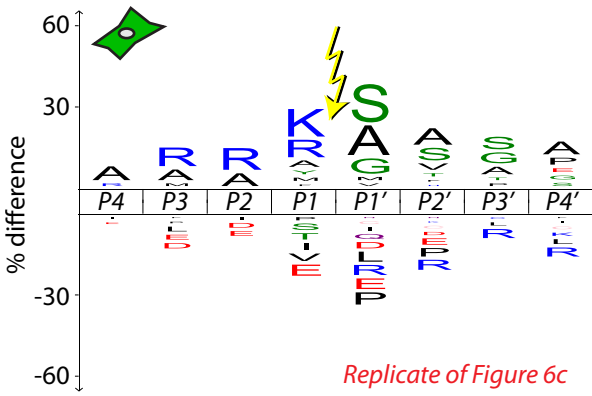

b. Apoptotic dataset, cleavage site P1' is 3-65

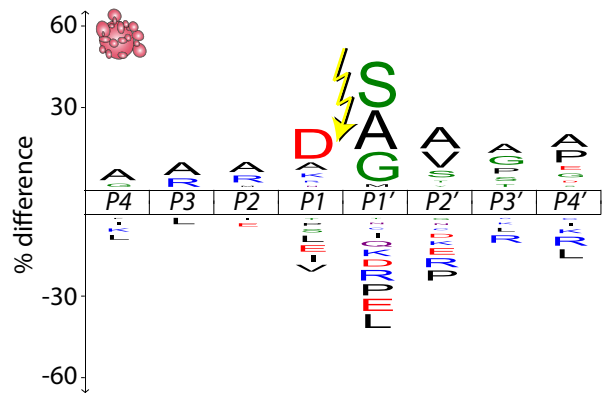

c. Untreated dataset, cleavage site P1' is 66+

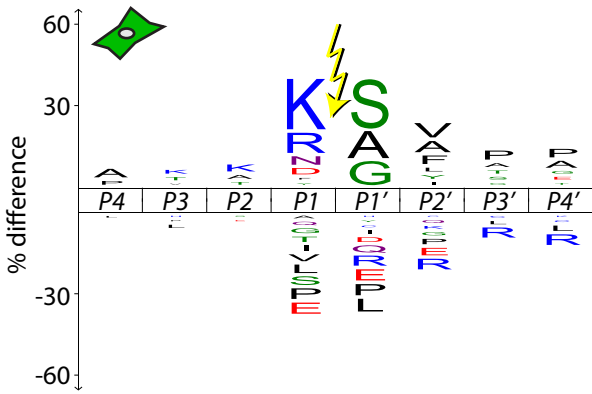

d. Apoptotic dataset, cleavage site P1' is 66+

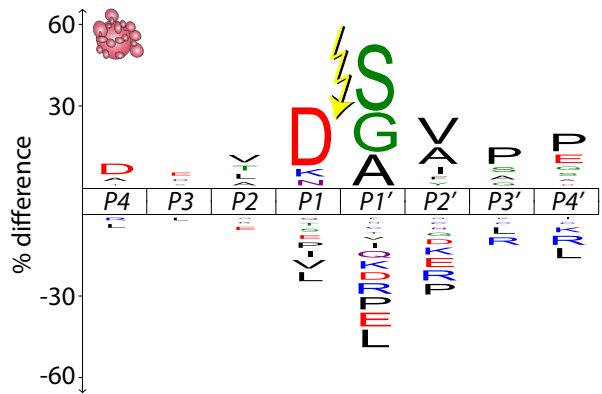

Supplement: supp_O112.024372_mcp.O112.024372-10.pdf [file supp_O112.024372_mcp.O112.024372-10.pdf]
